# Supplementary material for: Enantioselectivity and catalysis improvements of Pseudomonas cepacia lipase with Tyr and Asp modification
Source: Royal Society of Chemistry journal article supplement (doi:10.1039/c5cy00110b), 2015-01-01
Supplement: c5cy00110b1.pdf [file c5cy00110b1.pdf]

Electronic Supplementary Material (ESI) for Catalysis Science & Technology.  
This journal is © The Royal Society of Chemistry 2015

---

## **Enantioselectivity and Catalysis Improvements of *Pseudomonas Cepacia* Lipase with Tyr and Asp Modification**

Jing Li,<sup>a, b</sup> Lei Yue,<sup>b</sup> Chang Li,<sup>b</sup> Yuanjiang Pan<sup>\*b</sup> and Lirong Yang<sup>\*a</sup>

<sup>a</sup>Institute of Biological Engineering, Department of Chemical & Biological Engineering, Zhejiang University, Hangzhou 310027, Zhejiang, China.

<sup>b</sup>Department of Chemistry, Zhejiang University, Hangzhou, 310027, Zhejiang, China.

### **SUPPORTING INFORMATION**

#### **Table of Contents**

|                                                                                                                                                                                                                                                                                                    |    |
|----------------------------------------------------------------------------------------------------------------------------------------------------------------------------------------------------------------------------------------------------------------------------------------------------|----|
| 1. Enantioselectivity and binding free energy for the hydrolysis of the other four substrates ( <i>sec</i> -butyl butyrate, <i>sec</i> -butyl hexanoate, <i>hexan</i> -2-yl acetate and <i>octan</i> -2-yl acetate) .....                                                                          | 2  |
| 2. Modification degree and potential modification sites .....                                                                                                                                                                                                                                      | 4  |
| 3. Theoretical peptide masses and MALDI-TOF-MS characterization .....                                                                                                                                                                                                                              | 5  |
| 4. Correlation of $ \Delta(\Delta G) $ and enantioselectivity for the hydrolysis the other four substrates ( <i>sec</i> -butyl butyrate, <i>sec</i> -butyl hexanoate, <i>hexan</i> -2-yl acetate and <i>octan</i> -2-yl acetate) .....                                                             | 8  |
| 5. Activity standard deviation (three parallel experiments) of the <i>p</i> -NPP hydrolysis by modification reagent, native and modified <i>PcL</i> in aqueous solution .....                                                                                                                      | 10 |
| 6. The enantioselectivity standard deviation (three parallel experiments) of the hydrolysis of <i>sec</i> -butyl acetate, <i>sec</i> -butyl butyrate, <i>sec</i> -butyl hexanoate, <i>hexan</i> -2-yl acetate and <i>octan</i> -2-yl acetate catalyzed by the native and modified <i>PcL</i> ..... | 11 |
| 7. The $ee_s$ of the hydrolysis of <i>sec</i> -butyl acetate, <i>sec</i> -butyl butyrate, <i>sec</i> -butyl hexanoate, <i>hexan</i> -2-yl acetate and <i>octan</i> -2-yl acetate catalyzed by the native and modified <i>PcL</i> .....                                                             | 12 |
| 8. The method of $ee_s$ and enantioselectivity calculation .....                                                                                                                                                                                                                                   | 13 |

**Table S1** The initial rate and the enantioselectivity for the hydrolysis of *sec*-butyl butyrate, *sec*-butyl hexanoate, *hexan*-2-yl acetate and *octan*-2-yl acetate catalyzed by the native and modified *PcL*.

| Substrate                   | Modification reagent              | Initial rate( $\mu\text{mol min}^{-1}$ ) | <i>E</i> value | Enantiopreference |
|-----------------------------|-----------------------------------|------------------------------------------|----------------|-------------------|
|                             |                                   | $V_R$                                    |                |                   |
| <i>Sec</i> -butyl butyrate  | Native <i>PcL</i>                 | 12.0                                     | 1.1            | R                 |
|                             | NAI alone                         | 10.6                                     | 1.2            | R                 |
|                             | NAI + <i>n</i> -hexane            | 8.6                                      | 3.4            | R                 |
|                             | I <sub>3</sub> alone              | 11.3                                     | 1.7            | R                 |
|                             | I <sub>3</sub> + <i>n</i> -hexane | 10.2                                     | 2.0            | R                 |
|                             | EDA alone                         | 14.0                                     | 2.2            | R                 |
|                             | EDC alone                         | 6.8                                      | 3.0            | R                 |
|                             | Native <i>PcL</i>                 | 13.1                                     | 1.2            | R                 |
| <i>Sec</i> -butyl hexanoate | NAI alone                         | 9.7                                      | 1.2            | R                 |
|                             | NAI + <i>n</i> -hexane            | 11.0                                     | 3.1            | R                 |
|                             | I <sub>3</sub> alone              | 12.1                                     | 1.8            | R                 |
|                             | I <sub>3</sub> + <i>n</i> -hexane | 9.3                                      | 2.3            | R                 |
|                             | EDA alone                         | 14.7                                     | 2.3            | R                 |
|                             | EDC alone                         | 8.2                                      | 3.2            | R                 |
|                             | Native <i>PcL</i>                 | 11.2                                     | 1.6            | R                 |
|                             | NAI alone                         | 10.8                                     | 1.8            | R                 |
| <i>Hexan</i> -2-yl acetate  | NAI + <i>n</i> -hexane            | 8.7                                      | 3.9            | R                 |
|                             | I <sub>3</sub> alone              | 10.6                                     | 2.6            | R                 |
|                             | I <sub>3</sub> + <i>n</i> -hexane | 10.3                                     | 3.1            | R                 |
|                             | EDA alone                         | 12.8                                     | 3.0            | R                 |
|                             | EDC alone                         | 6.3                                      | 3.7            | R                 |
|                             | Native <i>PcL</i>                 | 12.3                                     | 1.9            | R                 |
|                             | NAI alone                         | 9.8                                      | 2.0            | R                 |
|                             | NAI + <i>n</i> -hexane            | 9.1                                      | 4.5            | R                 |
| <i>Octan</i> -2-yl acetate  | I <sub>3</sub> alone              | 11.0                                     | 3.0            | R                 |
|                             | I <sub>3</sub> + <i>n</i> -hexane | 11.6                                     | 3.5            | R                 |
|                             | EDA alone                         | 13.6                                     | 3.3            | R                 |
|                             | EDC alone                         | 7.8                                      | 4.0            | R                 |

**Table S2** The binding free energy of *PcL* and *sec*-butyl butyrate, *sec*-butyl hexanoate, *hexan*-2-yl acetate and *octan*-2-yl acetate.

| Substrate                   | Modification reagent                           | Binding free energy (kJ/mol) |                  | $\Delta(\Delta G)$  <br>(kJ/mol) |
|-----------------------------|------------------------------------------------|------------------------------|------------------|----------------------------------|
|                             |                                                | R ( $\Delta G$ )             | S ( $\Delta G$ ) |                                  |
| <i>Sec</i> -butyl butyrate  | Native <i>PcL</i>                              | -21.50                       | -20.34           | 0.2                              |
|                             | NAI alone                                      | -19.87                       | -19.68           | 0.2                              |
|                             | NAI + <i>n</i> -hexane                         | -28.88                       | -13.61           | 15.3                             |
|                             | I <sub>3</sub> <sup>-</sup> alone              | -17.18                       | -12.79           | 4.4                              |
|                             | I <sub>3</sub> <sup>-</sup> + <i>n</i> -hexane | -26.07                       | -17.36           | 9.6                              |
|                             | EDA alone                                      | -10.58                       | -0.26            | 10.3                             |
|                             | EDC alone                                      | -22.68                       | -9.15            | 13.5                             |
|                             | Native <i>PcL</i>                              | -18.65                       | -16.49           | 2.2                              |
| <i>Sec</i> -butyl hexanoate | NAI alone                                      | -22.86                       | -20.20           | 2.7                              |
|                             | NAI + <i>n</i> -hexane                         | -26.79                       | -9.69            | 17.1                             |
|                             | I <sub>3</sub> <sup>-</sup> alone              | -30.19                       | -18.65           | 11.5                             |
|                             | I <sub>3</sub> <sup>-</sup> + <i>n</i> -hexane | -30.81                       | -17.16           | 13.7                             |
|                             | EDA alone                                      | -22.68                       | -8.70            | 14.0                             |
|                             | EDC alone                                      | -21.47                       | -5.67            | 15.8                             |
|                             | Native <i>PcL</i>                              | -18.91                       | -16.67           | 2.2                              |
|                             | NAI alone                                      | -15.60                       | -12.94           | 2.7                              |
| <i>hexan</i> -2-yl acetate  | NAI + <i>n</i> -hexane                         | -28.65                       | -4.50            | 24.1                             |
|                             | I <sub>3</sub> <sup>-</sup> alone              | -28.65                       | -17.13           | 11.5                             |
|                             | I <sub>3</sub> <sup>-</sup> + <i>n</i> -hexane | -18.66                       | -3.98            | 14.7                             |
|                             | EDA alone                                      | -20.71                       | -5.61            | 15.1                             |
|                             | EDC alone                                      | -17.82                       | -0.50            | 17.3                             |
|                             | Native <i>PcL</i>                              | -11.93                       | -11.61           | 0.3                              |
|                             | NAI alone                                      | -7.49                        | -7.20            | 0.3                              |
|                             | NAI + <i>n</i> -hexane                         | -18.93                       | -10.02           | 8.9                              |
| <i>octan</i> -2-yl acetate  | I <sub>3</sub> <sup>-</sup> alone              | -13.30                       | -11.02           | 2.3                              |
|                             | I <sub>3</sub> <sup>-</sup> + <i>n</i> -hexane | -13.55                       | -8.74            | 4.8                              |
|                             | EDA alone                                      | -26.81                       | -22.75           | 4.1                              |
|                             | EDC alone                                      | -17.31                       | -9.40            | 7.9                              |

Table S3 Modification degree of *PcL*

| Entry | Modification reagent                           | Modification site | Modification degree |
|-------|------------------------------------------------|-------------------|---------------------|
| 1     | NAI + <i>n</i> -hexane                         | Tyr <sup>4</sup>  | 61.6                |
|       |                                                | Tyr <sup>29</sup> | 19.2                |
|       |                                                | Tyr <sup>45</sup> | 4.1                 |
|       |                                                | Tyr <sup>95</sup> | 1.1                 |
| 2     | NAI alone                                      | Tyr <sup>4</sup>  | 56.4                |
|       |                                                | Tyr <sup>45</sup> | 3.7                 |
|       |                                                | Tyr <sup>95</sup> | 1.2                 |
| 3     | I <sub>3</sub> <sup>-</sup> + <i>n</i> -hexane | Tyr <sup>29</sup> | 12.3                |
|       |                                                | Tyr <sup>45</sup> | 37.2                |
|       |                                                | Tyr <sup>95</sup> | 2.1                 |
| 4     | I <sub>3</sub> <sup>-</sup> alone              | Tyr <sup>45</sup> | 53.3                |
|       |                                                | Tyr <sup>95</sup> | 4.0                 |
| 5     | EDA alone                                      | Asp <sup>36</sup> | 8.2                 |
| 6     | EDC alone                                      | Asp <sup>55</sup> | 5.7                 |

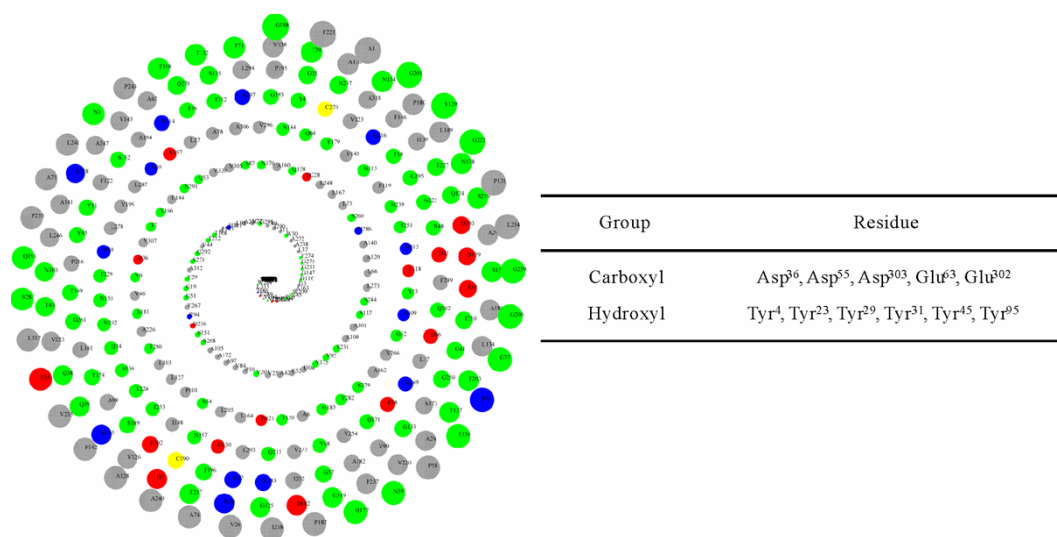

Fig.S1 Potential modification sites of PcL scanned by accessible surface analysis (ASA).

**Table S4** Theoretical peptide masses of *PcL*

| Mass ( <i>m/z</i> ) | Position | Peptide sequence      |
|---------------------|----------|-----------------------|
| 2231.0767           | 23-40    | YVGVLEYWYGIQEDLQQR    |
| 2138.1604           | 95-115   | YVAAPDLVASVTTIGTPHR   |
| 2124.9944           | 41-61    | GATVYVANLSGFQSDDGPNGR |
| 1706.8972           | 284-297  | WNHLDEINQLLGVR        |
| 1526.8577           | 9-22     | YPIILVHGLTGTDK        |
| 1519.7461           | 270-283  | CSALYGQVLSTSYK        |
| 1424.7604           | 81-94    | VNLVGHSQGGLTSR        |
| 1211.6378           | 298-309  | GANAEDPVAVIR          |
| 1047.5065           | 259-269  | GSGQNDGVVSK           |
| 1020.5724           | 62-70    | GEGQNDGVVSK           |
| 881.4111            | 1-8      | ADNYAATR              |

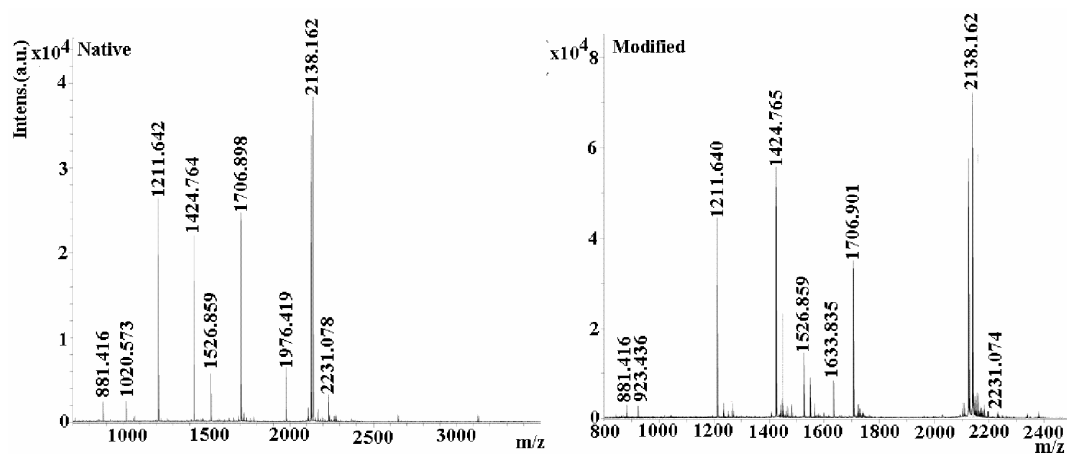

**Fig.S2** MALDI-TOF fingerprint mass spectra obtained by tryptic digestion of native and NAI modified *PcL* in the presence of *n*-hexane.

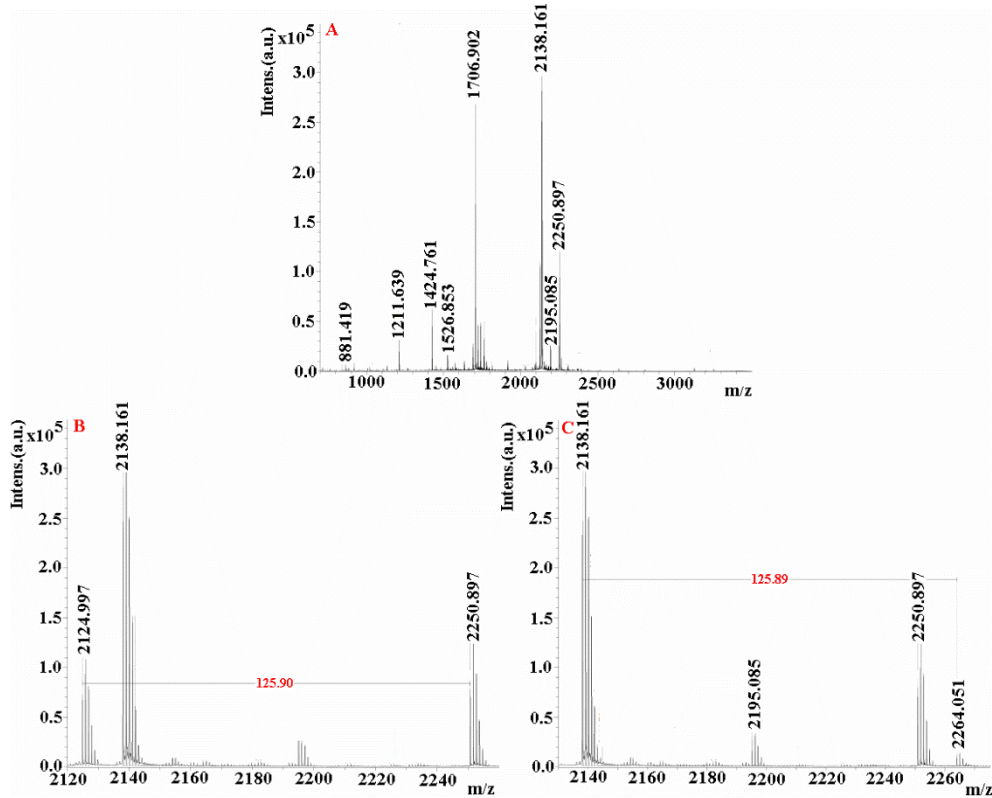

**Fig.S3** MALDI-TOF mass spectra by tryptic digestion of  $I_3^-$  modified *PcLin* the absence of *n*-hexane. (A) mass fingerprint spectrum (B) expanded mass spectrum, Tyr<sup>45</sup> modification,  $m/z$  change from 2124.997 to 2250.897 (C) expanded mass spectrum, Tyr<sup>95</sup> modification,  $m/z$  change from 2138.161 to 2264.051.

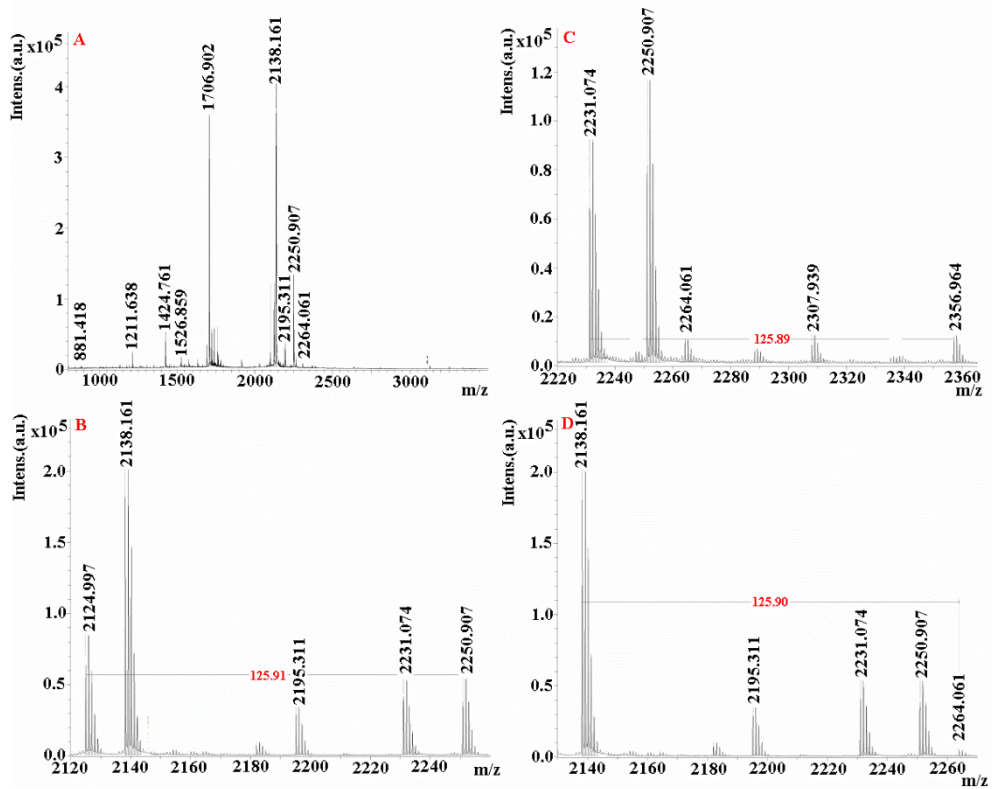

**Fig.S4** MALDI-TOF mass spectra by tryptic digestion of  $I_3^-$  modified *PcLin* the presence of *n*-hexane. (A) mass fingerprint spectrum (B) expanded mass spectrum, Tyr<sup>45</sup> modification,  $m/z$  change from 2124.997 to 2250.907 (C) expanded mass spectrum, Tyr<sup>29</sup> modification,  $m/z$  change from 2231.074 to 2356.964 (D) expanded mass spectrum, Tyr<sup>95</sup> modification,  $m/z$  change from 2138.164 to 2264.064.

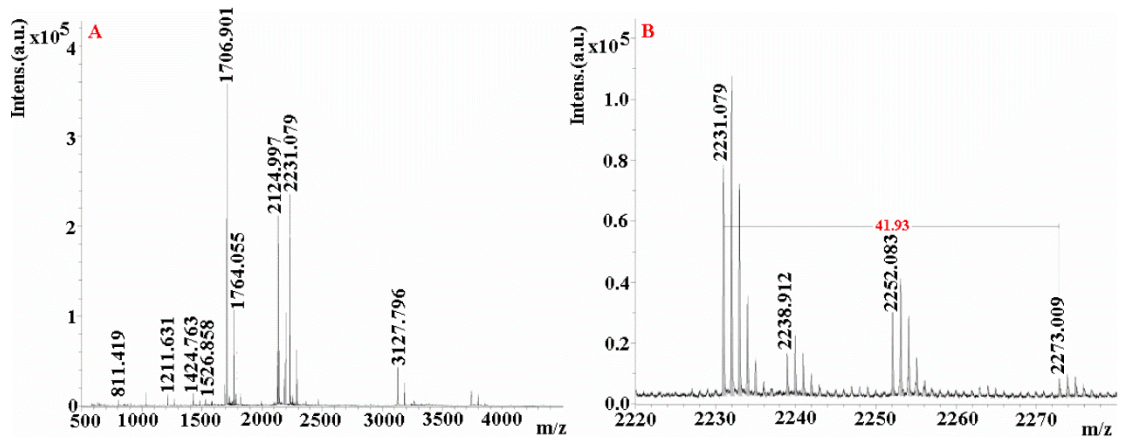

Fig.S5 MALDI-TOF mass spectra by tryptic digestion of EDA modified *PcLin* in the absence of *n*-hexane. (A) mass fingerprint spectrum (B) expanded mass spectrum, Asp<sup>36</sup> modification, *m/z* change from 2231.079 to 2273.009.

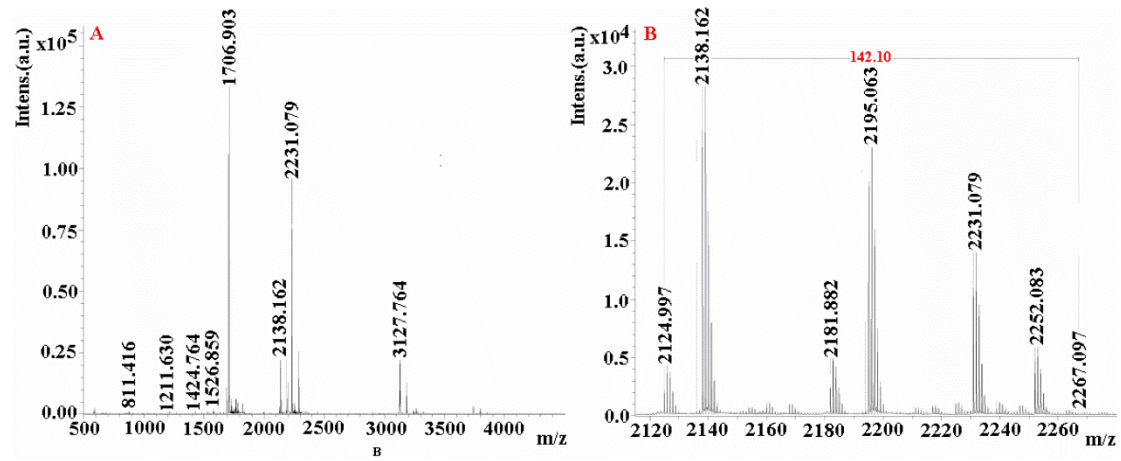

Fig.S6 MALDI-TOF mass spectra by tryptic digestion of EDC modified *PcLin* in the absence of *n*-hexane. (A) mass fingerprint spectrum (B) expanded mass spectrum, Asp<sup>55</sup> modification, *m/z* change from 2124.997 to 2267.097.

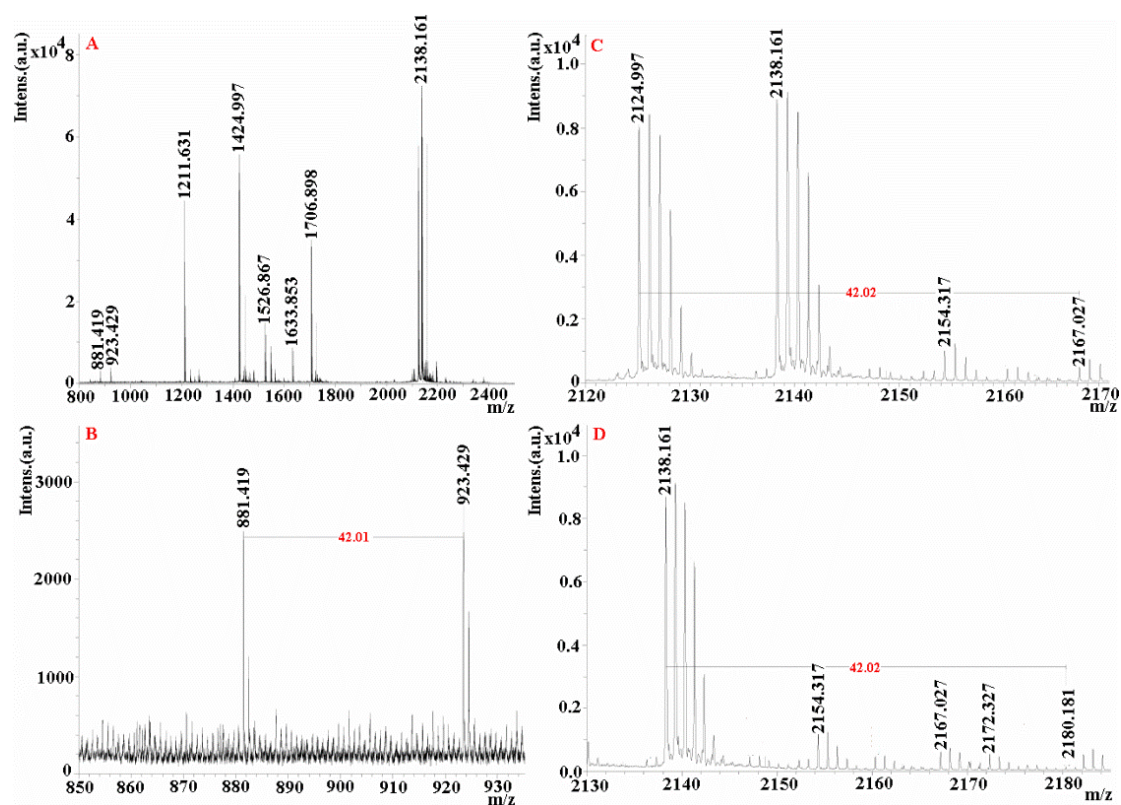

**Fig.S7** MALDI-TOF mass spectra by tryptic digestion of NAI modified *PcL* in the absence of *n*-hexane. (A) mass fingerprint spectrum (B) expanded mass spectrum, Tyr<sup>4</sup> modification, *m/z* change from 881.419 to 923.429 (C) expanded mass spectrum, Tyr<sup>45</sup> modification, *m/z* change from 2124.997 to 2167.027 (D) expanded mass spectrum, Tyr<sup>95</sup> modification, *m/z* change from 2138.161 to 2180.181.

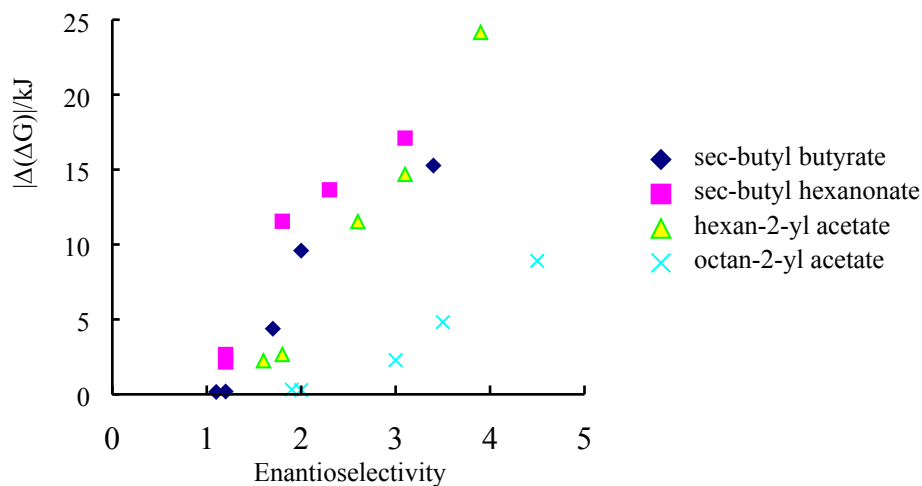

**Fig.S8** Correlation of  $|\Delta(\Delta G)|$  and enantioselectivity corresponding to native and modified *PcL* at Tyr.



**Table S5** Activity standard deviation (three parallel experiments) of the *p*-NPP hydrolysis by modification reagents, native and modified *PcL* in aqueous solution.

| Lipase assay substrate                          | Modification reagent       | Concentration (mM/L) | Standard deviation |
|-------------------------------------------------|----------------------------|----------------------|--------------------|
| <i>p</i> -nitrophenyl palmitate( <i>p</i> -NPP) | NAI + <i>n</i> -hexane     | 0 (0 mg/L)           | 0                  |
|                                                 |                            | 0.02 (2 mg/L)        | 0.02               |
|                                                 |                            | 0.07 (8 mg/L)        | 0.01               |
|                                                 |                            | 0.15 (16 mg/L)       | 0.01               |
|                                                 |                            | 0.29 (32 mg/L)       | 0.02               |
|                                                 | NAI alone                  | 0 (0 mg/L)           | 0                  |
|                                                 |                            | 0.02 (2 mg/L)        | 0.01               |
|                                                 |                            | 0.07 (8 mg/L)        | 0.02               |
|                                                 |                            | 0.15 (16 mg/L)       | 0.02               |
|                                                 |                            | 0.29 (32 mg/L)       | 0.008              |
|                                                 | NAI without <i>PcL</i>     | 0 (0 mg/L)           | 0.01               |
|                                                 |                            | 0.02 (2 mg/L)        | 0.01               |
|                                                 |                            | 0.07 (8 mg/L)        | 0.01               |
|                                                 |                            | 0.15 (16 mg/L)       | 0.008              |
|                                                 |                            | 0.29 (32 mg/L)       | 0.008              |
|                                                 | $I_3^-$ + <i>n</i> -hexane | 0                    | 0                  |
|                                                 |                            | 20                   | 0.01               |
|                                                 |                            | 40                   | 0.02               |
|                                                 |                            | 80                   | 0.01               |
|                                                 | $I_3^-$ alone              | 0                    | 0                  |
|                                                 |                            | 20                   | 0.02               |
|                                                 |                            | 40                   | 0.02               |
|                                                 |                            | 80                   | 0.01               |
|                                                 | $I_3^-$ without <i>PcL</i> | 0                    | 0.01               |
|                                                 |                            | 20                   | 0.01               |
| 40                                              |                            | 0.008                |                    |
| 80                                              |                            | 0.008                |                    |
| EDC alone                                       | 0                          | 0                    |                    |
|                                                 | 62.5                       | 0.01                 |                    |
|                                                 | 250                        | 0.01                 |                    |
|                                                 | 500                        | 0.01                 |                    |
|                                                 | 1000                       | 0.02                 |                    |
| EDC without <i>PcL</i>                          | 0                          | 0.01                 |                    |
|                                                 | 62.5                       | 0.01                 |                    |
|                                                 | 250                        | 0.008                |                    |
|                                                 | 500                        | 0.01                 |                    |
|                                                 | 1000                       | 0.02                 |                    |

|  |                        |       |       |
|--|------------------------|-------|-------|
|  | EDA alone              | 0     | 0     |
|  |                        | 31.25 | 0.02  |
|  |                        | 125   | 0.01  |
|  |                        | 500   | 0.02  |
|  |                        | 1000  | 0.01  |
|  |                        | 1500  | 0.01  |
|  | EDA without <i>PcL</i> | 0     | 0.008 |
|  |                        | 31.25 | 0.008 |
|  |                        | 125   | 0.01  |
|  |                        | 500   | 0.008 |
|  |                        | 1000  | 0.01  |
|  |                        | 1500  | 0.008 |

**Table S6** The enantioselectivity standard deviation (three parallel experiments) of the hydrolysis of *sec*-butyl acetate, *sec*-butyl butyrate, *sec*-butyl hexanoate, *hexan*-2-yl acetate and *octan*-2-yl acetate catalyzed by the native and modified *PcL*.

| Substrate                   | Modification reagent                           | Enantioselectivity standard deviation |
|-----------------------------|------------------------------------------------|---------------------------------------|
| <i>sec</i> -butyl acetate   | Native <i>PcL</i>                              | 0.01                                  |
|                             | NAI alone                                      | 0.02                                  |
|                             | NAI + <i>n</i> -hexane                         | 0.02                                  |
|                             | I <sub>3</sub> <sup>-</sup> alone              | 0.02                                  |
|                             | I <sub>3</sub> <sup>-</sup> + <i>n</i> -hexane | 0.01                                  |
|                             | EDA alone                                      | 0.02                                  |
|                             | EDC alone                                      | 0.02                                  |
| <i>Sec</i> -butyl butyrate  | Native <i>PcL</i>                              | 0.009                                 |
|                             | NAI alone                                      | 0.008                                 |
|                             | NAI + <i>n</i> -hexane                         | 0.01                                  |
|                             | I <sub>3</sub> <sup>-</sup> alone              | 0.01                                  |
|                             | I <sub>3</sub> <sup>-</sup> + <i>n</i> -hexane | 0.02                                  |
|                             | EDA alone                                      | 0.01                                  |
|                             | EDC alone                                      | 0.008                                 |
| <i>Sec</i> -butyl hexanoate | Native <i>PcL</i>                              | 0.008                                 |
|                             | NAI alone                                      | 0.009                                 |
|                             | NAI + <i>n</i> -hexane                         | 0.01                                  |
|                             | I <sub>3</sub> <sup>-</sup> alone              | 0.02                                  |
|                             | I <sub>3</sub> <sup>-</sup> + <i>n</i> -hexane | 0.01                                  |
|                             | EDA alone                                      | 0.02                                  |
|                             | EDC alone                                      | 0.01                                  |
| <i>Hexan</i> -2-yl acetate  | Native <i>PcL</i>                              | 0.01                                  |
|                             | NAI alone                                      | 0.01                                  |
|                             | NAI + <i>n</i> -hexane                         | 0.008                                 |
|                             | I <sub>3</sub> <sup>-</sup> alone              | 0.01                                  |
|                             | I <sub>3</sub> <sup>-</sup> + <i>n</i> -hexane | 0.01                                  |
|                             | EDA alone                                      | 0.01                                  |
|                             | EDC alone                                      | 0.01                                  |
| <i>Octan</i> -2-yl acetate  | Native <i>PcL</i>                              | 0.01                                  |
|                             | NAI alone                                      | 0.01                                  |
|                             | NAI + <i>n</i> -hexane                         | 0.008                                 |
|                             | I <sub>3</sub> <sup>-</sup> alone              | 0.01                                  |
|                             | I <sub>3</sub> <sup>-</sup> + <i>n</i> -hexane | 0.01                                  |
|                             | EDA alone                                      | 0.02                                  |
|                             | EDC alone                                      | 0.02                                  |

**Table S7** The ee<sub>s</sub> of the hydrolysis of *sec*-butyl acetate, *sec*-butyl butyrate, *sec*-butyl hexanoate, *hexan*-2-yl acetate and *octan*-2-yl acetate catalyzed by the native and modified *PcL*.

| Substrate                   | Modification reagent                           | ee <sub>s</sub> |
|-----------------------------|------------------------------------------------|-----------------|
| <i>sec</i> -butyl acetate   | Native <i>PcL</i>                              | 7%              |
|                             | NAI alone                                      | 9%              |
|                             | NAI + <i>n</i> -hexane                         | 47%             |
|                             | I <sub>3</sub> <sup>-</sup> alone              | 26%             |
|                             | I <sub>3</sub> <sup>-</sup> + <i>n</i> -hexane | 32%             |
|                             | EDA alone                                      | 36%             |
|                             | EDC alone                                      | 47%             |
| <i>Sec</i> -butyl butyrate  | Native <i>PcL</i>                              | 8%              |
|                             | NAI alone                                      | 10%             |
|                             | NAI + <i>n</i> -hexane                         | 48%             |
|                             | I <sub>3</sub> <sup>-</sup> alone              | 27%             |
|                             | I <sub>3</sub> <sup>-</sup> + <i>n</i> -hexane | 34%             |
|                             | EDA alone                                      | 33%             |
|                             | EDC alone                                      | 46%             |
| <i>Sec</i> -butyl hexanoate | Native <i>PcL</i>                              | 8%              |
|                             | NAI alone                                      | 9%              |
|                             | NAI + <i>n</i> -hexane                         | 48%             |
|                             | I <sub>3</sub> <sup>-</sup> alone              | 27%             |
|                             | I <sub>3</sub> <sup>-</sup> + <i>n</i> -hexane | 33%             |
|                             | EDA alone                                      | 38%             |
|                             | EDC alone                                      | 47%             |
| <i>Hexan</i> -2-yl acetate  | Native <i>PcL</i>                              | 12%             |
|                             | NAI alone                                      | 16%             |
|                             | NAI + <i>n</i> -hexane                         | 55%             |
|                             | I <sub>3</sub> <sup>-</sup> alone              | 32%             |
|                             | I <sub>3</sub> <sup>-</sup> + <i>n</i> -hexane | 45%             |
|                             | EDA alone                                      | 47%             |
|                             | EDC alone                                      | 53%             |
| <i>Octan</i> -2-yl acetate  | Native <i>PcL</i>                              | 15%             |
|                             | NAI alone                                      | 20%             |
|                             | NAI + <i>n</i> -hexane                         | 61%             |
|                             | I <sub>3</sub> <sup>-</sup> alone              | 47%             |
|                             | I <sub>3</sub> <sup>-</sup> + <i>n</i> -hexane | 52%             |
|                             | EDA alone                                      | 49%             |
|                             | EDC alone                                      | 57%             |

Enantiomeric excess of (*R*)-secondary alcohol ( $ee_s$ ) and enantioselectivity (E value) were calculated as defined below, where  $A_R$  and  $A_S$  were the peak area of (*R*)-secondary alcohol and (*S*)-secondary alcohol. Internal standard was n-octane which was used to determine the concentration. Conversion ratio was defined as  $c$ ,  $c = ee_s/(ee_s+ee_p)$ .

$$ee_s = \frac{A_R - A_S}{A_R + A_S} \qquad E = \frac{\ln [(1-c)(1-ee_s)]}{\ln [(1-c)(1+ee_s)]}$$
